# Supplementary material for: Chaperoning of specific tau structure by immunophilin FKBP12 regulates the neuronal resilience to extracellular stress
Source: PubMed Central journal article supplement (PMC9891691; doi:10.1126/sciadv.add9789), 2023-02-01
Supplement: sciadv.add9789_sm.pdf [file sciadv.add9789_sm.pdf]

Supplementary Materials for  
**Chaperoning of specific tau structure by immunophilin FKBP12 regulates the neuronal resilience to extracellular stress**

Lulu Jiang *et al.*

Corresponding author: Benjamin Wolozin, [bwolozin@bu.edu](mailto:bwolozin@bu.edu); Markus Zweckstetter, [Markus.Zweckstetter@dzne.de](mailto:Markus.Zweckstetter@dzne.de)

*Sci. Adv.* **9**, eadd9789 (2023)  
DOI: 10.1126/sciadv.add9789

**This PDF file includes:**

Figs. S1 to S3

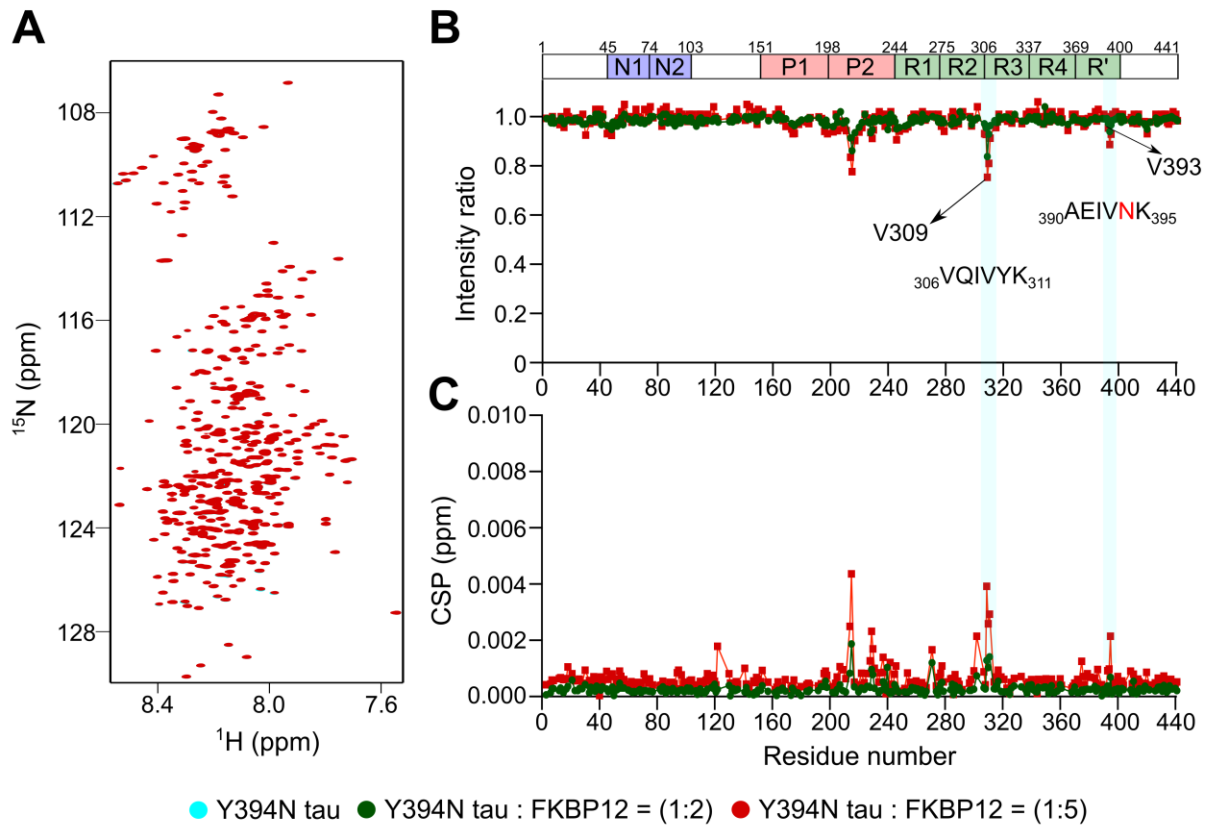

**Supplementary Figure 1. Interaction between Y394N tau and FKBP12.** **A**, 2D  $^1\text{H}$ - $^{15}\text{N}$  HSQC spectra of Y394N tau in the absence (cyan) or five-fold excess (red) of FKBP12. **B,C** Changes in the intensities (**B**) and chemical shift perturbations (**C**) of cross-peaks in the HSQC spectra of Y394N tau upon addition of two-fold (green) and five-fold (red) excess of FKBP12. The domain organization of tau is shown on top.

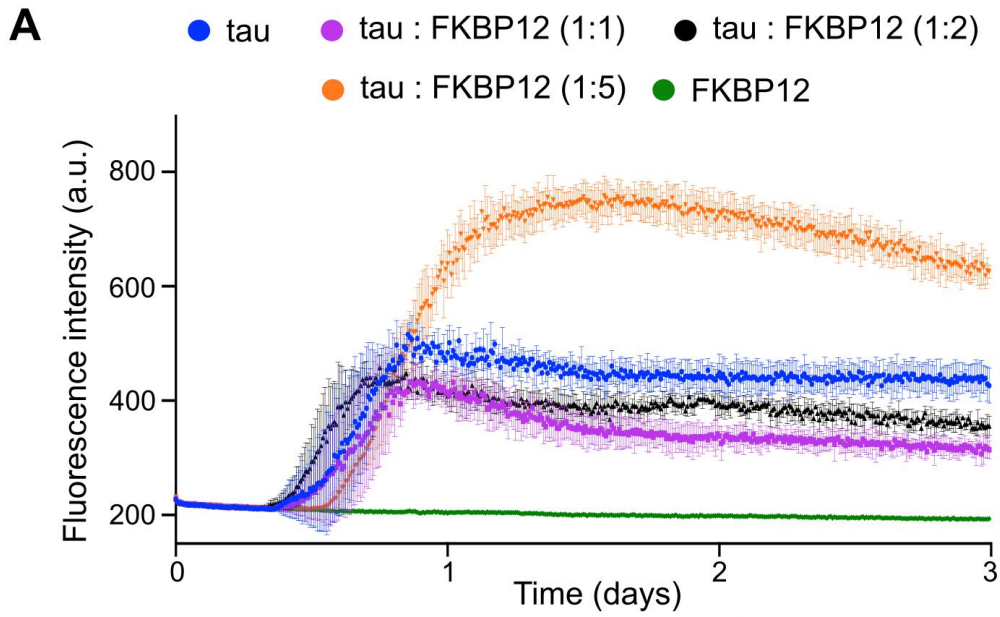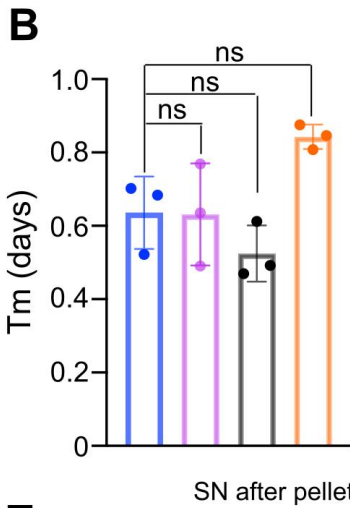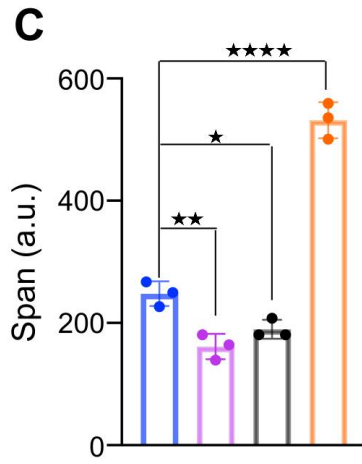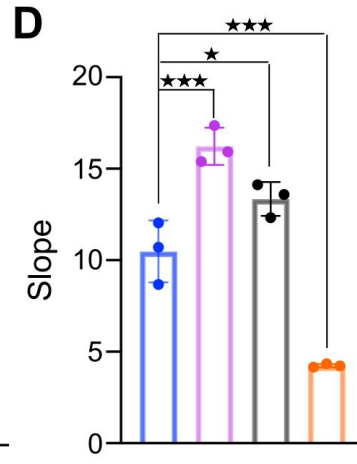

SN after pelleting down fibrils

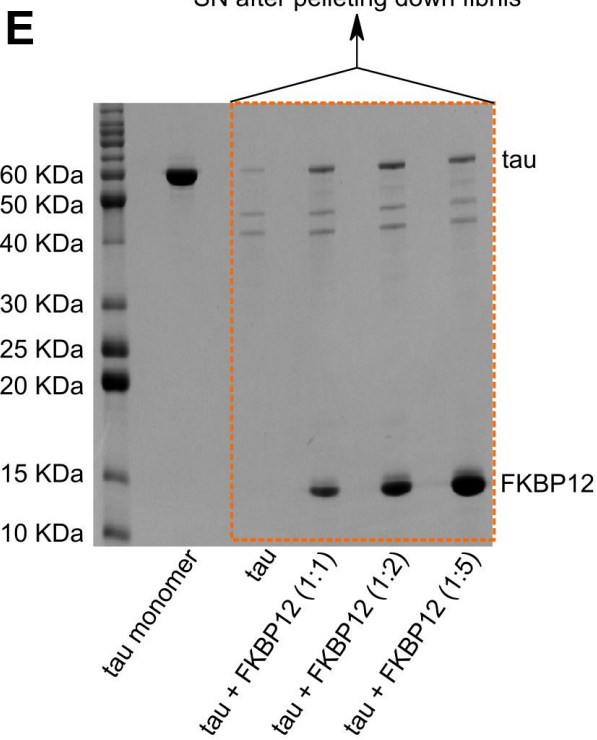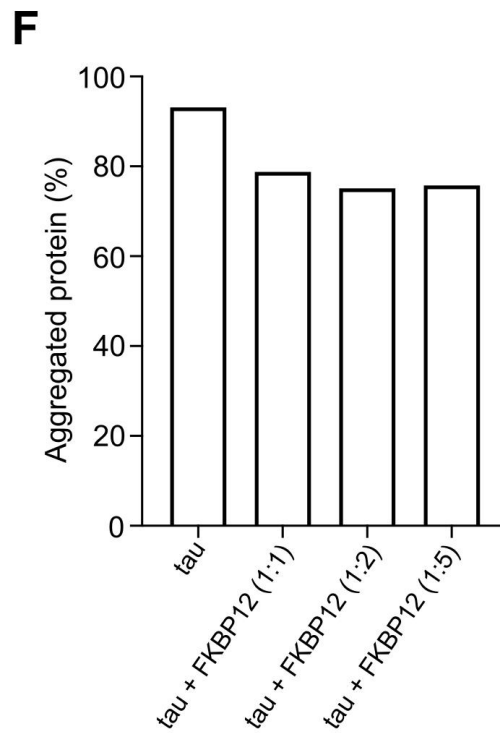

**Supplementary Figure 2. Effect of FKBP12 on the *de novo* aggregation of tau.** **A.** Aggregation kinetics of 25  $\mu$ M tau in the absence (blue) or presence of equimolar (purple), 2-fold (black) or 5-fold (orange) excess of FKBP12. 125  $\mu$ M of FKBP12 (5-fold molar excess of tau) didn't aggregate (green) even after incubation for three days. Error bars represent standard deviation of three independent samples. **B.** Half time of aggregation ( $T_m$ ) of tau in the absence (blue) or presence of equimolar (purple), 2-fold (black) or 5-fold (orange) excess of FKBP12. Data are represented as mean  $\pm$  standard deviation of n=3 samples. The statistical analysis was performed by one-way ANOVA. **C.** Span of Thioflavin-T intensity in the aggregation curves of tau in the absence (blue) or presence of equimolar (purple), two-fold (black) or five-fold (orange) FKBP12 excess. Data are represented as mean  $\pm$  standard deviation of n=3 samples. The statistical analysis was performed by one-way ANOVA. \* $p = 0.0305$ , \*\* $p = 0.0036$ , \*\*\*\* $p < 0.0001$  **D.** Rate of elongation of tau fibrils (slope) without (blue) or with equimolar (purple), two-fold (black) or five-fold (orange) excess of FKBP12. Data are represented as mean  $\pm$  standard deviation of n=3 samples. The statistical analysis was performed by one-way ANOVA. \*  $p = 0.0305$ , \*\*\* $p$  [tau vs tau+FKBP12 (1:1)] = 0.0005, \*\*\* $p$  [tau vs tau+FKBP12 (1:5)] = 0.0003 **E.** SDS-PAGE gel of the monomeric tau protein and the supernatant (SN) of the tau fibrils (after centrifugation) either in the absence or presence of equimolar, two-fold, or five-fold excess of FKBP12. The fibril samples were taken after the three days of aggregation, shown in (A). **F.** Quantification of aggregated tau. The % of aggregated tau protein was determined by dividing the intensity of the supernatant (SN) to the monomeric tau.

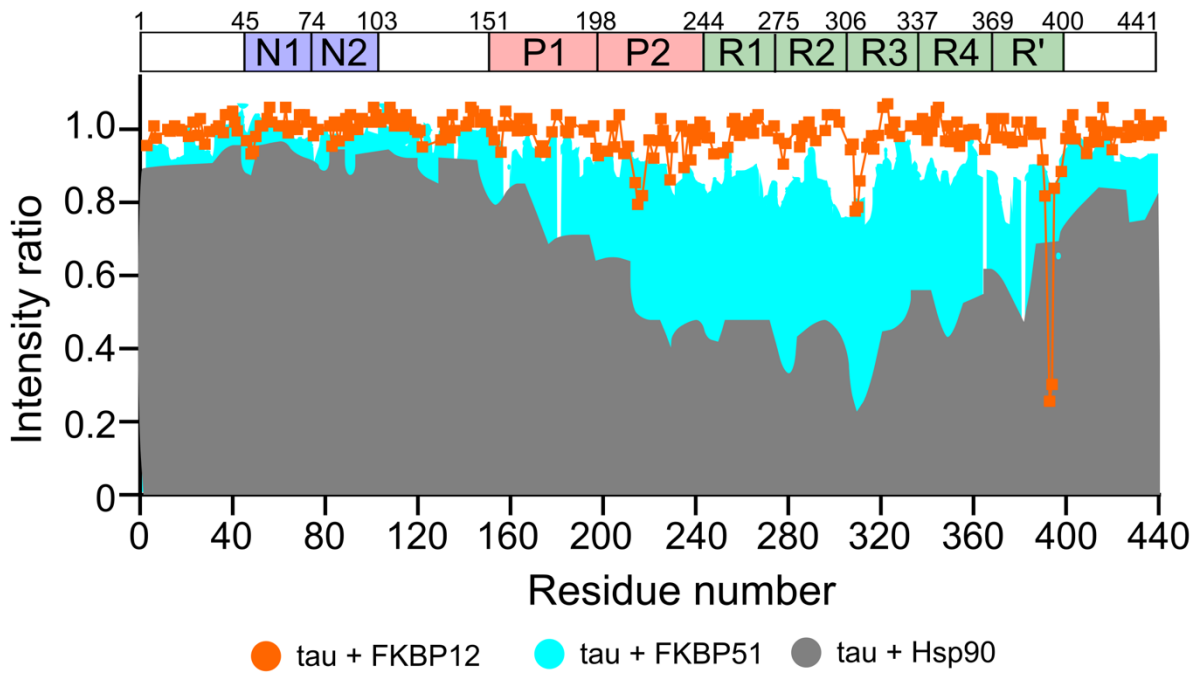

**Supplementary Figure 3. Comparison between the interaction of FKBP12, FKBP51, and Hsp90 with tau.** Intensity ratio broadening of tau in the presence of FKBP12 (orange), FKBP51 (cyan), and Hsp90 (grey). The intensity ratio plot of tau in the presence of FKBP51 & Hsp90 is taken from Baker et al (**Reference #52 in main manuscript**) & Karagöz et al (**Reference #49 in main manuscript**), respectively.
